# Supplementary material for: Rational construction of Au3Cu@Cu nanocages with porous core–shell heterostructured walls for enhanced electrocatalytic N2fixation
Source: Royal Society of Chemistry journal article supplement (doi:10.1039/d1ta01058a), 2021-01-01
Supplement: d1ta01058a1.pdf [file d1ta01058a1.pdf]

## Electronic Supplementary Information

### Experimental Section

**Product Determination:** The ammonia concentration after the NRR test was estimated by the indoxyl blue method.<sup>1</sup> After 2 h of chronopotentiometric measurement, 4 mL of electrolyte was mixed after electrolysis with 0.5 mL of 0.32 M NaOH solution containing 0.4 M sodium salicylate, 50  $\mu$ L of 0.05 M NaClO solution containing 0.75 M NaOH, and 50  $\mu$ L of 1 wt% C<sub>5</sub>FeN<sub>6</sub>Na<sub>2</sub>O for 1 h. The mixed solution after being left in the dark for 1 h was measured using the ultraviolet–visible (UV–vis) spectrophotometer by a TU-1900 spectrophotometer, and calibrate the produced indoxyl blue by the absorbance at 680 nm wavelength. In order to estimate the ammonia concentration, a series of standard ammonium chloride (NH<sub>4</sub>Cl) solutions are used to calibrate the concentration absorbance curve.

The ammonia yield ( $r_{\text{NH}_3}$ ) and Faradaic efficiency (FE) was calculated as follows:

$$r_{\text{NH}_3} = (c_{\text{NH}_3} \times V) / t \times m \quad (1)$$

$$\text{FE} = 3F \times n_{\text{NH}_3} / Q \quad (2)$$

where  $c_{\text{NH}_3}$  ( $\mu\text{g mL}^{-1}$ ) is the NH<sub>3</sub> concentration,  $V$  (mL) is the volume of the electrolyte,  $t$  (h) is electrolysis time,  $m$  (mg) is the mass catalyst mass,  $F$  is the Faraday constant ( $96485 \text{ C mol}^{-1}$ ),  $n_{\text{NH}_3}$  (mol) is the NH<sub>3</sub> concentration and  $Q$  (C) is the total electric quantity during each NRR process.

**Determination of N<sub>2</sub>H<sub>4</sub>:** Hydrazine was determined by the method of Watt and Chrisp.<sup>2</sup> In short, 5 mL of electrolyte was mixed with 5 mL of coloring reagent for 20 min. The color reagent was prepared by mixing 5.99 g of *p*-(dimethylamino) benzaldehyde, 300 mL of ethanol, and concentrated 30 mL of HCl. The N<sub>2</sub>H<sub>4</sub> produced was measured using an absorbance at 455 nm.

**<sup>15</sup>N<sub>2</sub> Isotope Labeling Experiments:** The <sup>15</sup>N<sub>2</sub> was purchased from WUHAN NEWRADAR

SPECIAL GAS Co., LTD.  $^{15}\text{N}_2$  was used as feed gas for isotope labeling experiments to verify the source of ammonia. In this experiment,  $^{15}\text{N}_2$  was electrolyzed at -0.2 V for 10 h, the electrolyte solution was concentrated to 3 mL, and then the pH was adjusted to 1~2 by adding 1 M  $\text{H}_2\text{SO}_4$ . Take out 1 mL of the above electrolyte and mix it with 0.1 mL of  $\text{D}_2\text{O}$  and the  $\text{NH}_3$  produced was measured using  $^1\text{H-NMR}$ .

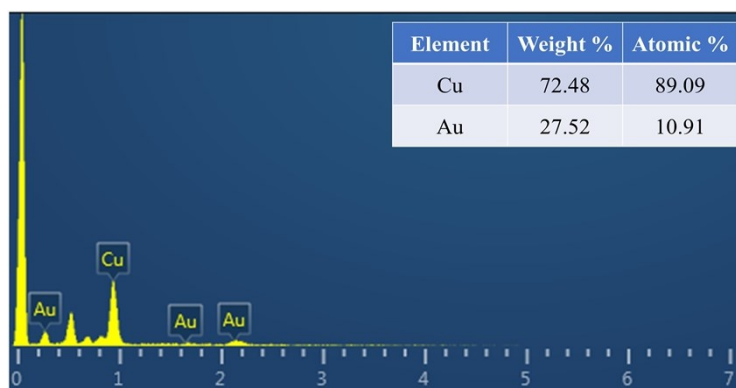

Fig. S1 EDX spectra of the Au<sub>3</sub>Cu@Cu nanocages.

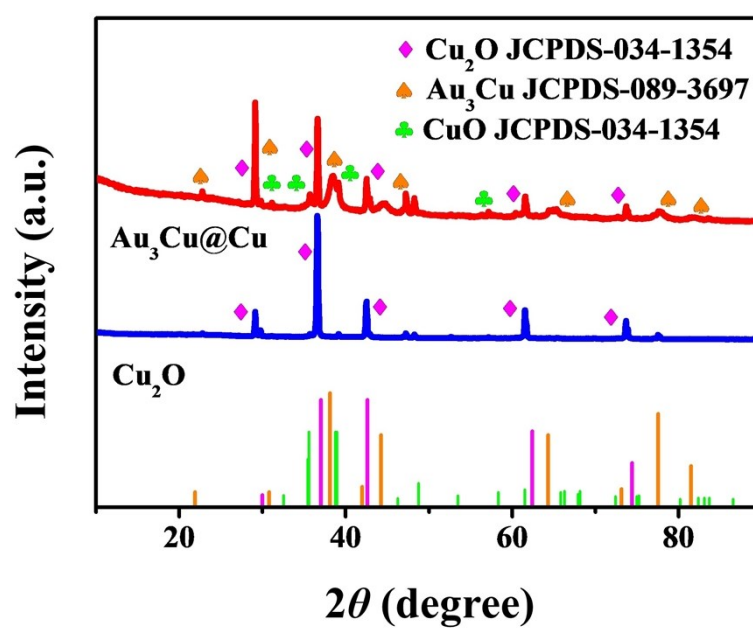

Fig. S2 XRD patterns for the Au<sub>3</sub>Cu@Cu nanocages and Cu<sub>2</sub>O nanocubes.

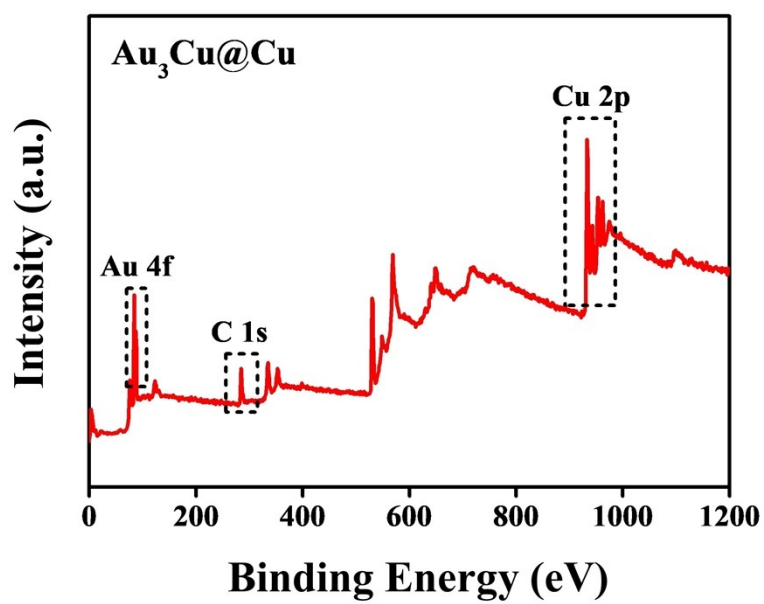

Fig. S3 XPS survey spectrum of the  $\text{Au}_3\text{Cu@Cu}$  nanocages.

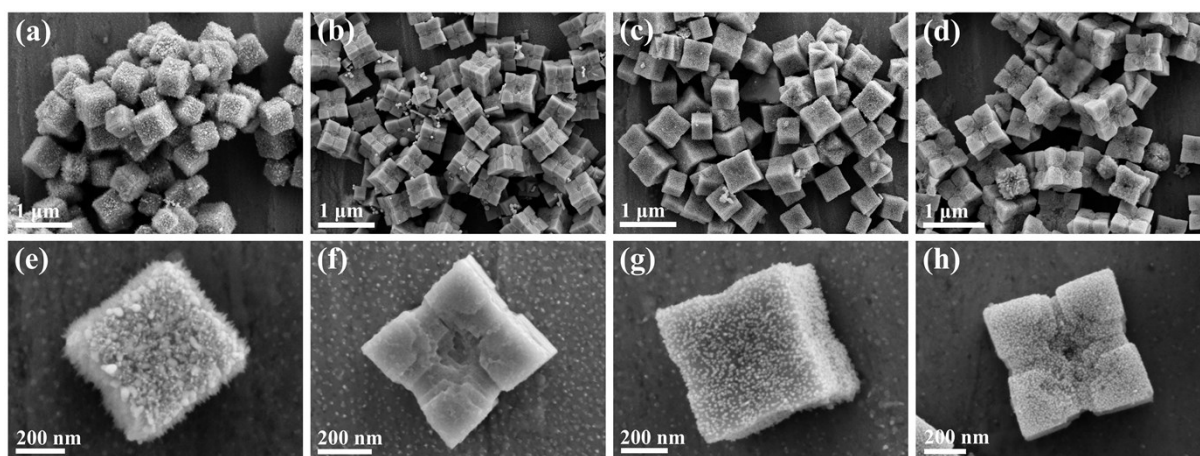

Fig. S4 SEM images of the samples prepared (a and e) without PVP, (b and f) with CTAB, (c and g) with F127 and (d and h) with DM970, respectively, under the typical synthesis.

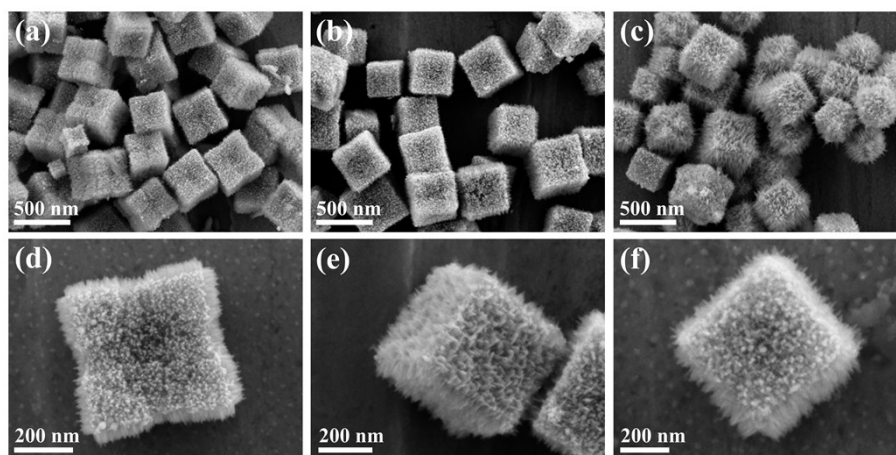

**Fig. S5** SEM images of the samples prepared with different amounts of PVP under the typical synthesis: (a and d) 0.05 mg, (b and e) 0.10 mg, (c and f) 0.20 mg.

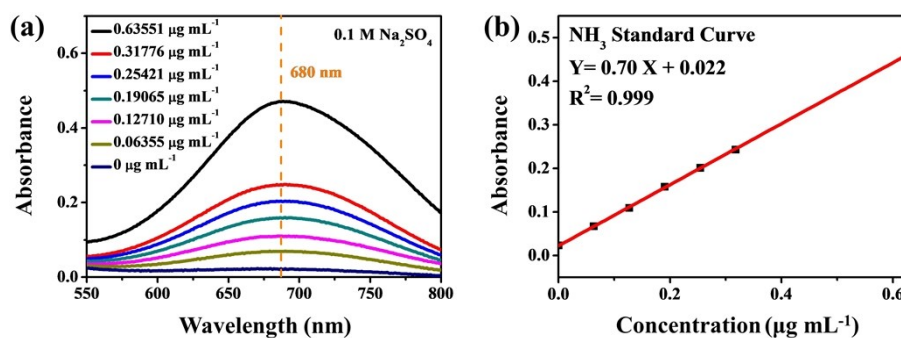

**Fig. S6** (a) The UV-Vis absorption spectra and (b) corresponding calibration curves for the colorimetric  $\text{NH}_4^+$  assay using the indophenol blue method in 0.1 M  $\text{Na}_2\text{SO}_4$ .

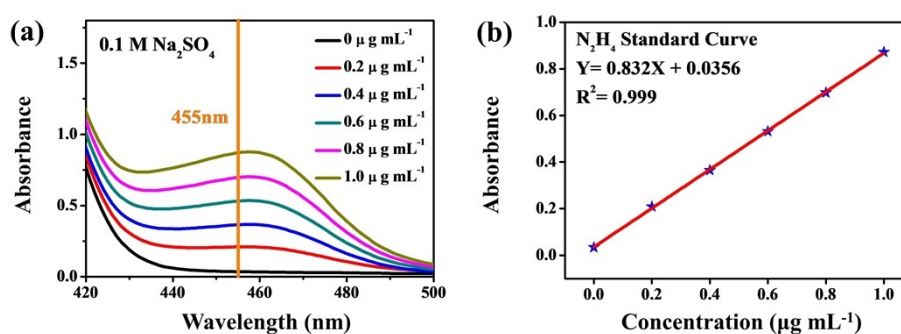

**Fig. S7** (a) The UV-Vis absorption spectra and (b) corresponding calibration curve for the colorimetric  $\text{N}_2\text{H}_4$  assay in 0.1 M  $\text{Na}_2\text{SO}_4$ .

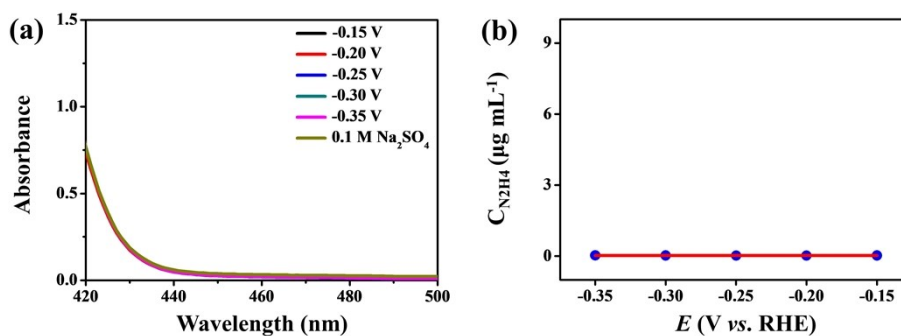

**Fig. S8** (a) The UV-Vis absorption spectra and (b) corresponding yield rate of  $\text{N}_2\text{H}_4$  formation at selected potentials.

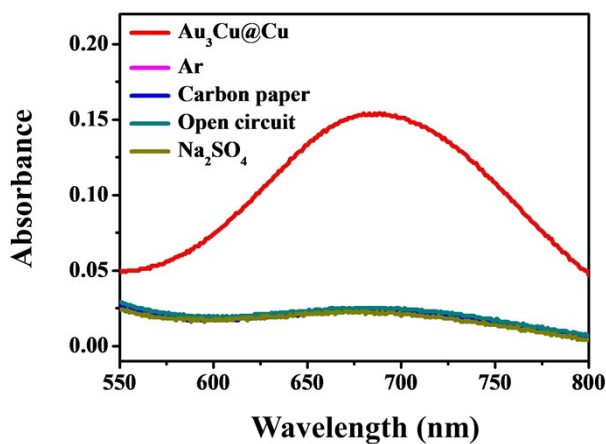

**Fig. S9** UV-vis absorption spectra of different solutions after electrolysis for 2 h.

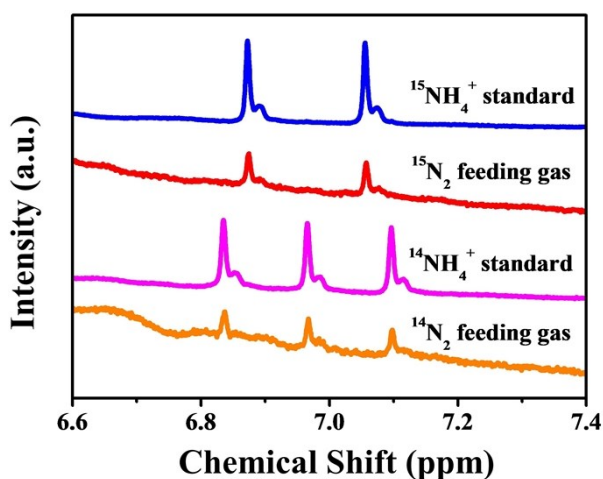

**Fig. S10**  $^1\text{H}$  NMR spectra of both  $^{14}\text{NH}_4^+$  and  $^{15}\text{NH}_4^+$  produced from  $\text{N}_2$  electrochemical reduction using  $^{14}\text{N}_2$  and  $^{15}\text{N}_2$  as the feeding gas, respectively.

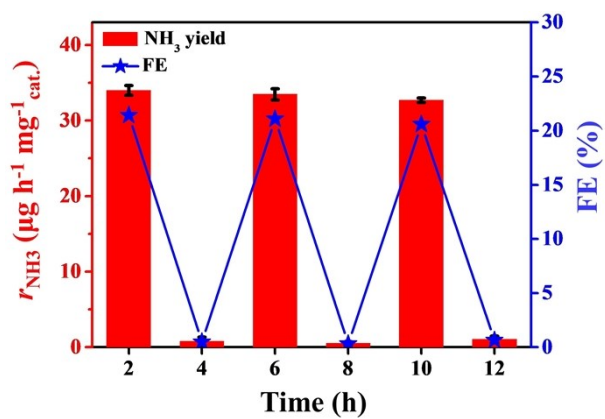

**Fig. S11**  $\text{NH}_3$  yields and FEs of  $\text{Au}_3\text{Cu}@Cu$  nanocages at a potential of  $-0.2$  V with alternating 2 h cycles between  $\text{N}_2$ -saturated and Ar-saturated electrolytes with a total of 12 h.

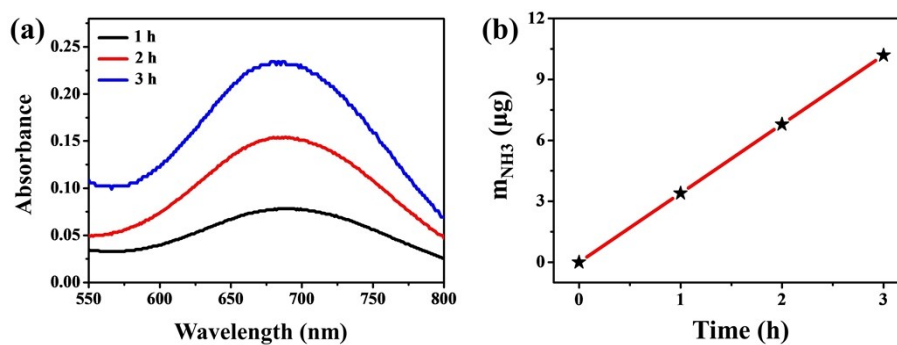

**Fig. S12** (a) UV-vis absorption spectra of electrolytic solutions at different reaction times. (b) Curve of  $\text{NH}_3$  production vs. reaction time at  $-0.2$  V over  $\text{Au}_3\text{Cu}@Cu$  nanocages.

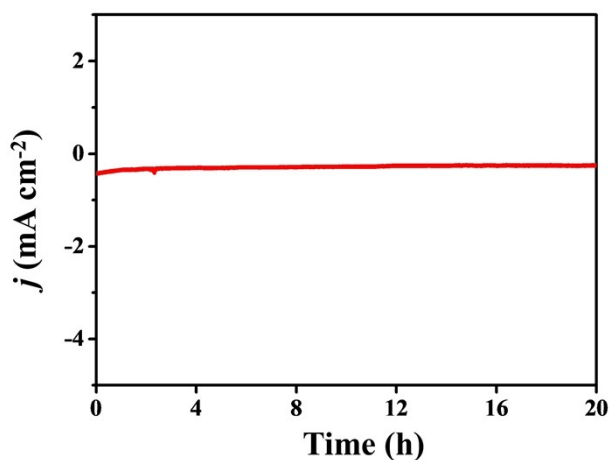

**Fig. S13** Time-dependent current density curves of the  $\text{Au}_3\text{Cu}@Cu$  nanocages at  $-0.2$  V for 20 h.

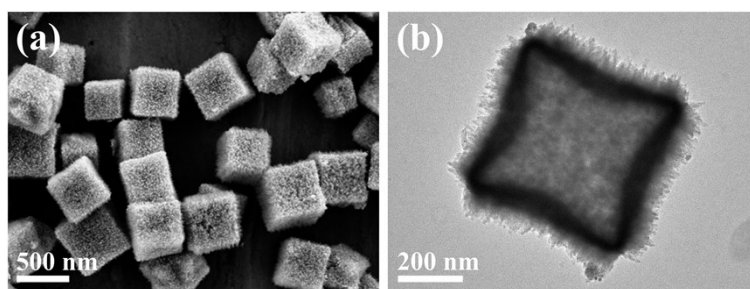

**Fig. S14** (a) SEM and (b) TEM images of Au<sub>3</sub>Cu@Cu nanocages after electrocatalytic stability testing.



**Table S1** Comparisons of the NRR performance of Au<sub>3</sub>Cu@Cu nanocages with other reported electrocatalysts.

| Catalysts                                       | Electrolyte                               | NH <sub>3</sub> yield rate                                    | FE (%)       | Ref.             |
|-------------------------------------------------|-------------------------------------------|---------------------------------------------------------------|--------------|------------------|
| <b>Au<sub>3</sub>Cu@Cu Nanocages</b>            | <b>0.1 M Na<sub>2</sub>SO<sub>4</sub></b> | <b>33.97 μg h<sup>-1</sup> mg<sup>-1</sup><sub>cat.</sub></b> | <b>21.41</b> | <b>This work</b> |
| Au(111)@Bi <sub>2</sub> S <sub>3</sub> Nanorods | 0.1 M Na <sub>2</sub> SO <sub>4</sub>     | 45.57 μg h <sup>-1</sup> mg <sup>-1</sup> <sub>cat.</sub>     | 3.10         | 3                |
| Au/o-CFP                                        | 0.1 M Na <sub>2</sub> SO <sub>4</sub>     | 40.60 μg h <sup>-1</sup> mg <sup>-1</sup> <sub>cat.</sub>     | 31.30        | 4                |
| AuPdP NWs                                       | 0.1 M Na <sub>2</sub> SO <sub>4</sub>     | 18.78 μg h <sup>-1</sup> mg <sup>-1</sup> <sub>cat.</sub>     | 15.44        | 5                |
| AuCu/ZIF-8                                      | 0.1 M Na <sub>2</sub> SO <sub>4</sub>     | 14.50 μg h <sup>-1</sup> mg <sup>-1</sup> <sub>cat.</sub>     | 6.70         | 6                |
| S/Au NWs                                        | 0.1 M Na <sub>2</sub> SO <sub>4</sub>     | 21.04 μg h <sup>-1</sup> mg <sup>-1</sup> <sub>cat.</sub>     | 15.34        | 7                |
| Ag <sub>3</sub> Cu BPNs                         | 0.1 M Na <sub>2</sub> SO <sub>4</sub>     | 24.59 μg h <sup>-1</sup> mg <sup>-1</sup> <sub>cat.</sub>     | 13.28        | 8                |
| Boron Nanosheet                                 | 0.1 M Na <sub>2</sub> SO <sub>4</sub>     | 13.22 μg h <sup>-1</sup> mg <sup>-1</sup> <sub>cat.</sub>     | 4.04         | 9                |
| Fe-doped TiO <sub>2</sub>                       | 0.5 M LiClO <sub>4</sub>                  | 25.47 μg h <sup>-1</sup> mg <sup>-1</sup> <sub>cat.</sub>     | 25.60        | 10               |

## References

1. D. Zhu, L. Zhang, R. E. Ruther and R. J. Hamers, *Nat Mater*, 2013, **12**, 836-841.
2. G. W. Watt and J. D. Chrisp., *Anal. Chem.*, 1952, **24**, 2006-2008.
3. L. Zhao, J. Zhou, L. Zhang, X. Sun, X. Sun, T. Yan, X. Ren and Q. Wei, *ACS Appl. Mater. Interfaces*, 2020, **12**, 55838-55843.
4. J. Zhang, B. Zhao, W. Liang, G. Zhou, Z. Liang, Y. Wang, J. Qu, Y. Sun and L. Jiang, *Adv. Sci.*, 2020, **7**, 2002630.
5. H. Wang, D. Yang, S. Liu, S. Yin, Y. Xu, X. Li, Z. Wang and L. Wang, *ACS Sustain. Chem. Eng.*, 2019, **7**, 15772-15777.
6. X.-W. Lv, L. Wang, G. Wang, R. Hao, J.-T. Ren, X. Liu, P. N. Duchesne, Y. Liu, W. Li, Z.-Y. Yuan and G. A. Ozin, *J. Mater. Chem. A*, 2020, **8**, 8868-8874.
7. H. Wang, D. Yang, S. Liu, S Yin, H. Yu, Y. Xu, X. Li, Z. Wang and L. Wang, *ACS Sustain. Chem. Eng.*, 2019, **7**, 19969-19974.
8. H. Yu, Z. Wang, D. Yang, X. Qian, Y. Xu, X. Li, H. Wang and L. Wang, *J. Mater. Chem. A*, 2019, **7**, 12526-12531.
9. X. Zhang, T. Wu, H. Wang, R. Zhao, H. Chen, T. Wang, P. Wei, Y. Luo, Y. Zhang and X. Sun, *ACS Catal.*, 2019, **9**, 4609-4615.
10. T. Wu, X. Zhu, Z. Xing, S. Mou, C. Li, Y. Qiao, Q. Liu, Y. Luo, X. Shi, Y. Zhang and X. Sun, *Angew. Chem., Int. Ed.*, 2019, **58**, 18449-18453.
